# **Prestimulus Activity in the Cingulo-Opercular Network Predicts Memory for Naturalistic Episodic Experience**

#Noga Cohen<sup>1,2</sup>, #Aya Ben-Yakov<sup>1,3</sup>, Jochen Weber<sup>2</sup>, Micah G. Edelson<sup>4</sup>, Rony Paz<sup>1</sup> and Yadin  
Dudai<sup>1</sup>

<sup>1</sup>Department of Neurobiology, Weizmann Institute of Science, 761000 Rehovot, Israel

<sup>2</sup>Department of Psychology, Columbia University, New York, NY, USA

<sup>3</sup>MRC Cognition and Brain Sciences Unit, University of Cambridge, Cambridge, UK

<sup>4</sup>Department of Economics, University of Zurich, 8006 Zurich, Switzerland

# equal contribution

## **Corresponding author:**

Noga Cohen, PhD

Department of Psychology

Columbia University

324 Schermerhorn Hall

1190 Amsterdam Avenue

New York, NY 10027

Email: [noga.cohen@columbia.edu](mailto:noga.cohen@columbia.edu) phone: 646-575-6456

1    **Abstract**

2    Human memory is strongly influenced by brain states occurring before an event, yet we  
3    know little about the underlying mechanisms. We found that activity in the cingulo-  
4    opercular network (including bilateral anterior insula and anterior prefrontal cortex)  
5    seconds before an event begins can predict whether this event will subsequently be  
6    remembered. We then replicated this finding using an independent data-set and tested how  
7    activity in the cingulo-opercular network shapes memory performance. Our findings  
8    indicate that prestimulus cingulo-opercular activity affects memory performance by  
9    oppositely modulating subsequent activity in two sets of regions previously linked to  
10   encoding and retrieval of episodic information. Specifically, higher prestimulus cingulo-  
11   opercular activity was associated with a subsequent increase in activity in temporal regions  
12   previously linked to encoding and with a subsequent reduction in activity within a set of  
13   regions thought to play a role in retrieval and self-referential processing. Together, these  
14   findings suggest that prestimulus attentional states modulate memory for real-life events  
15   by enhancing encoding and by dampening interference from competing memory  
16   substrates.

17

18   **Keywords:** cingulo-opercular network, episodic memory, fMRI, prestimulus, subsequent  
19   memory

20

21           Successful memory formation is associated with enhanced activity in brain regions  
22 linked to encoding such as the fusiform and medial temporal regions (Paller et al., 1987;  
23 Paller and Wagner, 2002; Kim, 2011), and with reduced activity in regions associated with  
24 retrieval and self-referential processes, such as the precuneus and posterior cingulate cortex  
25 (Kim et al., 2010). Thus far, the examination of the neural correlates of memory formation  
26 has focused mainly on the brain activity occurring during (e.g., Davachi et al., 2003;  
27 Eichenbaum et al., 2007; Kim et al., 2010; Kim, 2011) or following (Tambini et al., 2010;  
28 Ben-Yakov et al., 2011; Ben-Yakov et al., 2013; Staresina et al., 2013; Ben Yakov et al.,  
29 2014; Tompary et al., 2015) the presentation of the memoranda. Processes occurring before  
30 the onset of an event, however, also shape memory formation (Cohen et al., 2015). While  
31 some studies probed the prestimulus brain activity that predicts memory performance, it is  
32 yet unclear how prestimulus activity and activity during the stimulus interact to modulate  
33 encoding.

34           Prior studies that have examined memory-predictive prestimulus activity found that  
35 activity in regions such as the hippocampus, amygdala, and midbrain (Adcock et al., 2006;  
36 Mackiewicz et al., 2006; Wittmann et al., 2007; Park and Rugg, 2010; Addante et al., 2015;  
37 de Chastelaine & Rugg, 2015) predicted whether an upcoming event will be later  
38 remembered or forgotten. Specifically, compared to subsequently-forgotten stimuli,  
39 stimuli that were later remembered showed higher activity in these regions several seconds  
40 prior to stimulus onset. It was suggested that prestimulus activity in these regions enhance  
41 memory formation by preparing the system to encode the upcoming stimulus (e.g., by  
42 lowering the threshold for LTP in the medial temporal lobe; Frey et al., 1993; Huang and  
43 Kandel, 1995; Otmakhova and Lisman, 1996).

44 While the aforementioned studies provide important insights regarding the prestimulus  
45 brain correlates of memory formation, their findings may have been affected by specific  
46 task characteristics. Specifically, in most of these studies a cue informed the participant of  
47 the content of the upcoming to-be-remembered target. For example, memory-predictive  
48 prestimulus activity in the amygdala was found following a cue predicting a subsequent  
49 appearance of an unpleasant picture (Mackiewicz et al., 2006), while memory-predictive  
50 prestimulus activity in the midbrain was found following a cue predicting a rewarding  
51 target (Adcock et al., 2006). Furthermore, these studies did not examine the link between  
52 prestimulus activity and online stimulus activity and thus only provide indirect evidence as  
53 to how prestimulus activity modulates memory performance. The aim of the current study  
54 was therefore twofold: 1) identify prestimulus activity that predicts memory outcome in  
55 naturalistic settings, and 2) offer a mechanistic account for the role of this activity in  
56 shaping memory formation.

57 We first identified memory-predictive prestimulus activity using a subsequent  
58 memory functional magnetic resonance imaging (fMRI) study (Experiment 1). Participants  
59 were presented with realistic memoranda (brief narrative movie clips) and their memory  
60 for the main episode in each of the clips was tested following the scan using a cued-recall  
61 task. In Experiment 2 we analyzed an independent dataset to replicate the findings of  
62 Experiment 1 and to test two possible mechanistic accounts for the role of the observed  
63 prestimulus activity in shaping memory performance. Following the findings of  
64 Experiment 1 showing memory-predictive prestimulus activity in the cingulo-opercular  
65 network, which is commonly associated with top-down control of attention, we conducted  
66 two multi-level mediation analyses to test the following predictions regarding prestimulus

67 cingulo-opercular activity: 1) it enhances memory performance by boosting online  
68 encoding activity; 2) it enhances memory by suppressing task-unrelated, self-generated  
69 thoughts.

## 70 **Experiment 1**

71 Experiment 1 included a subsequent memory task in which participants were presented  
72 with realistic memoranda (brief narrative movie clips) in an fMRI scanner. Memory for the  
73 clips was tested outside the MRI about 20 minutes following the scan. In addition to BOLD  
74 signal, we collected eye tracking data (eye-movements, blinks and pupil size). These  
75 measures were used to control for participants' engagement and arousal during the task and  
76 are reported in the Supplementary Information.

## 77 **Materials and Methods**

### 78 *Participants*

79 Experiment 1 included 28 participants (12 male, mean age =  $25.5 \pm 3.2$ ). Two  
80 participants were excluded due to excessive head movements, three participants were  
81 excluded due to technical problems during the Study session, one participant was excluded  
82 due to low memory performance (correctly recalled less than 10% of the movies), hence  
83 the resulting sample included 22 participants (9 males, mean age =  $25.7 \pm 3.4$ ). The study  
84 was approved by the ethics committee of the Weizmann Institute of Science and all subjects  
85 gave informed consent prior to the experiment.

### 86 *Stimuli*

87 Each participant viewed 160 audiovisual clips (Ben-Yakov and Dudai, 2011). Of  
88 these clips, 140 were narrative movie clips and were used for the current analysis. Each

89 clip lasted 8 s and was preceded by an instruction stimulus (7/9/11 s) that included the  
90 Hebrew word for remember (לזכור) or look (לראות).

### 91 *Experimental protocol*

92 **Study session.** The Study session took place in an fMRI scanner and was divided  
93 into four scanning runs. Each run started and ended with the presentation of a blank screen  
94 for 10 s. Each trial (see Figure 1 for an example) started with a fixation cross for 2 s. Then,  
95 an instruction word (“remember”/”look”) was presented for a jittered length (7/9/11 s with  
96 an average of 8.5 s). In order to eliminate temporal anticipation effects, the distribution of  
97 instruction lengths was determined using the nonaging foreperiod distribution (Niemi &  
98 Näätänen, 1981). Specifically, there was a 50 % probability that the clip will appear in any  
99 given foreperiod. This structure was designed specifically to eliminate participants’ ability  
100 to predict when the clip will appear following the onset of the instruction cue. There were  
101 80 trials in the 7 s foreperiod, 40 trials in the 9 s foreperiod, and 20 trials in the 11s  
102 foreperiod. In addition, 20 catch trials were included, in which the clip was a visually  
103 scrambled clip accompanied by a non-distinctive background noise. Catch trials were  
104 always preceded by the longest foreperiod duration (11 s instruction), thus making it  
105 impossible for participants to predict whether the instruction would be followed by a  
106 narrative or by a control clip. Following the instruction word, a clip was presented for 8 s.  
107 Each trial ended with a fixation cross for 3 s.

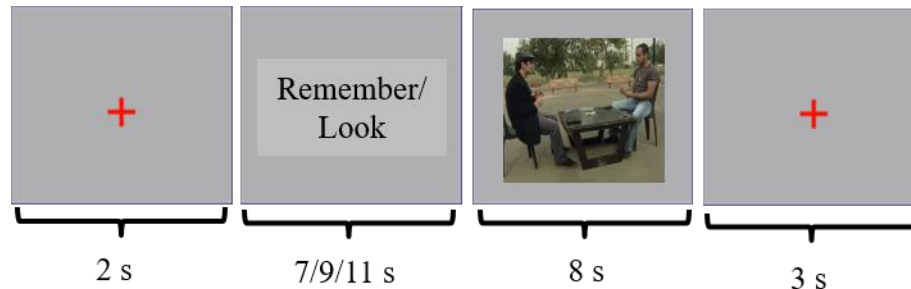

108

109 **Figure 1.** Example of a trial in the Study session.

110

111 **Test session.** The Test session took place outside the scanner, 20 min after the Study  
112 session. Participants were informed beforehand about the format of the Test session. The  
113 Test session consisted of questions about the gist of each of the clips (e.g., “What did the  
114 parents say to their son?”). Clips that received a correct answer were labeled as  
115 “remembered” and clips that received a wrong answer or no answer were labeled as  
116 “forgotten”. In cases where it was not completely clear whether an answer was correct, the  
117 corresponding clip was labeled as “X” and excluded from analysis. The test probed  
118 memory for all clips, including those preceded by the “look” instruction.

#### 119 *fMRI acquisition and data analysis*

120 The experiment was carried out on a 3T Trio Magnetom Siemens scanner at the  
121 Weizmann Institute of Science, Rehovot, Israel. BOLD contrast was obtained using a  
122 gradient-echo EPI sequence (FOV – 216 cm, matrix size – 72 x 72, voxel size – 3 x 3 x 4  
123 mm<sup>3</sup>, TR/TE/FA = 2,000 ms / 30 ms / 75 degrees, 32 axial slices). A T1-weighted 3D  
124 MPRAGE sequence was used to collect anatomical scans (voxel size – 1 x 1 x 1 mm<sup>3</sup>,  
125 TR/TE/FA = 2,300 ms / 2.98 ms / 9 degrees).

#### 126 *fMRI data pre-processing*

127 fMRI data were processed and analyzed using Statistical Parametric Mapping  
128 software (SPM8; Wellcome Department of Imaging Neuroscience, London, UK) with  
129 MATLAB 7.14.0 (the Mathwork, USA). Pre-processing included slice timing correction  
130 to the middle slice, motion correction using realignment to the first volume, and co-  
131 registration to the individual high-resolution anatomical image. Then, normalization to

132 Montreal Neurological Institute (MNI) space (Mazziotta et al., 1995) was performed using  
133 the unified segmentation approach (Ashburner and Friston, 2005). Images were then  
134 spatially smoothed with a 6-mm full width at half maximum (FWHM) Gaussian kernel.  
135 Voxel size following pre-processing was set to be 3 x 3 x 3 mm<sup>3</sup>.

### 136 *fMRI data analysis*

137         Prestimulus activity during the instruction time-window was modeled using box-  
138 car epochs with variable durations (i.e., from instruction onset to clip onset, lasting 7, 9, or  
139 11 seconds), convolved with the canonical hemodynamic response function (HRF). For  
140 each participant, a set of eight regressors were constructed, for all possible combinations  
141 of instruction type (remember/look) and clip type (remembered/forgotten/control/x). This  
142 resulted in the following conditions: remember-remembered, remember-forgotten,  
143 remember-control, remember-X, look-remembered, look-forgotten, look-control, look-X.  
144 In addition, six motion realignment nuisance regressors, as well as white matter (WM) and  
145 cerebrospinal fluid (CSF) regressors, were added to the GLM, and a high-pass filter of 100  
146 s was applied. The single-subject contrasts were then taken to a standard full factorial  
147 ANOVA with the relevant task conditions as factors (remember-remembered, look-  
148 remembered, remember-forgotten, look-forgotten). We used a second-level contrast to  
149 assess the main effect of interest (remembered > forgotten). See Supplementary  
150 Information for the main effect of instruction type (remember > look) and for control  
151 analyses showing no indication for sequential effects or modulation of the main effect by  
152 instruction duration or by prestimulus arousal (indicated by pupil size). The interaction  
153 between instruction type and memory performance did not reveal significant activations  
154 and therefore we collapsed across the two instruction types in the time course illustration



155 (Figure 2b; see Supplementary Information for time courses representing all four  
156 conditions).

157 For the whole-brain analysis, we used a voxel-level threshold of  $p < 0.001$  and a  
158 cluster-level threshold of  $pFWE < 0.05$ , using SPM's built-in Gaussian Random Fields  
159 (GRF) correction procedure. The cluster-forming threshold (CFT,  $p < 0.001$ ) was chosen  
160 to approximately correctly account for the expected false-positive rate using GRF (Eklund  
161 et al., 2016). For illustration purposes, time courses were extracted by Z-scoring the raw  
162 BOLD signal for each run of each participant. The time courses were then averaged across  
163 all events from the same type (remember-remembered, remember-forgotten, look-  
164 remembered, look-forgotten) within each participant and then across participants. Time  
165 courses are displayed with error bars indicating the standard error of the mean across  
166 participants (random-effects).

## 167 **Results**

### 168 *Memory performance*

169 Participants remembered  $39\% \pm 3.16\%$  of the clips. See Supplementary Information  
170 for behavioral effects related to instruction type.

### 171 *Prestimulus activity in the cingulo-opercular network predicts subsequent memory.*

172 In order to identify regions demonstrating higher prestimulus activity for  
173 subsequently remembered vs. forgotten clips, we conducted a whole-brain analysis  
174 (cluster-forming threshold  $p < 0.001$ , cluster- $pFWE < 0.05$ ), in the instruction time window  
175 (7/9/11 sec). This analysis yielded significant activity in a set of regions usually considered  
176 to be part of the cingulo-opercular network (see Figure 2a and Table 1). Illustration of this

177 effect can be seen in Figure 2b, which depicts the mean BOLD signal for remembered and  
178 forgotten clips, extracted from two selected regions of interest (ROI).

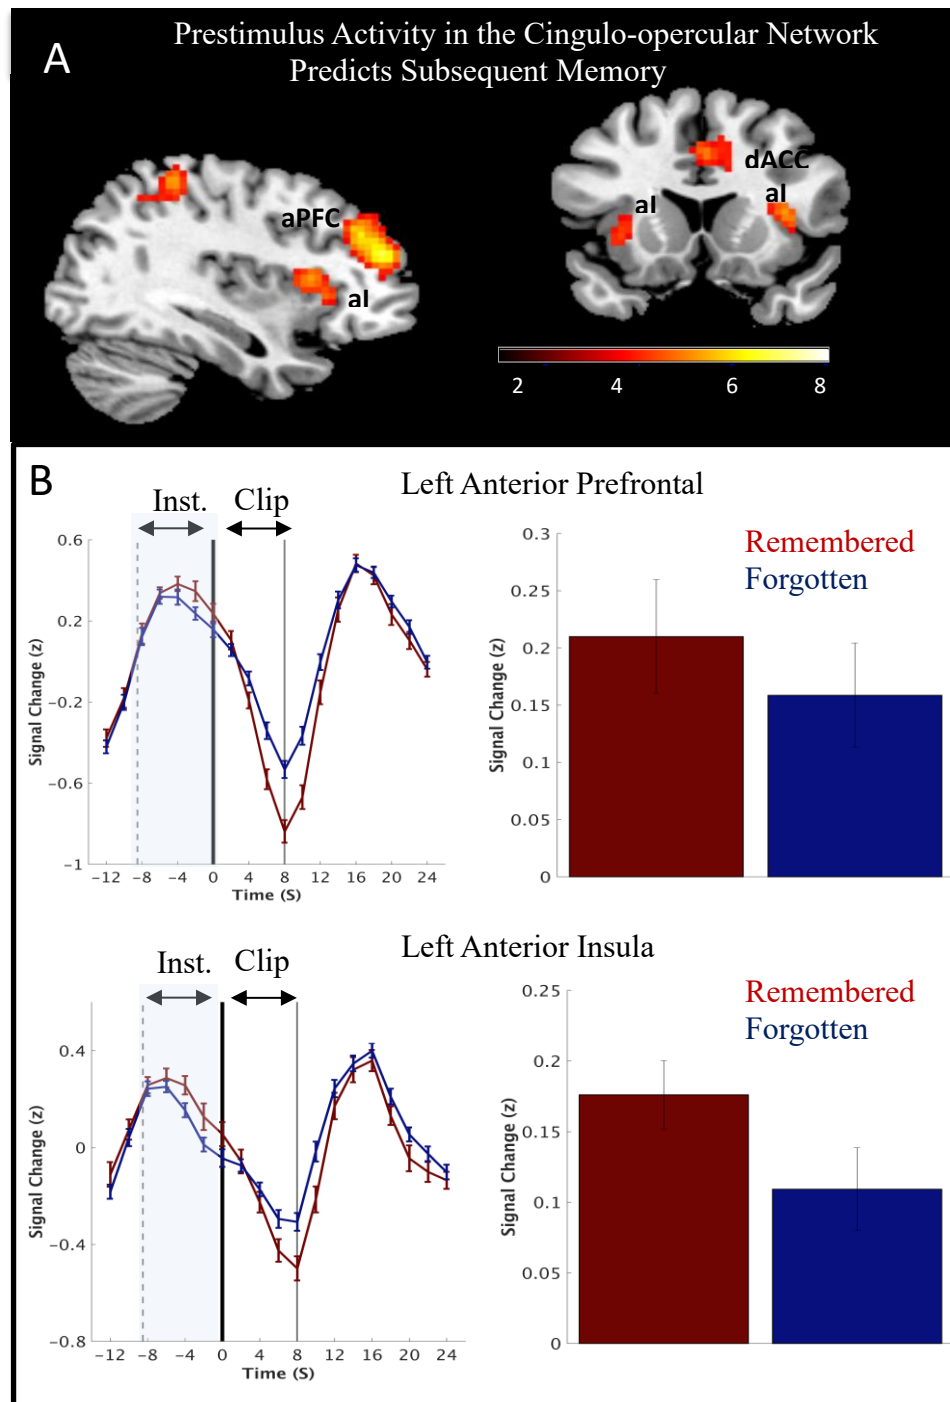

179

180 **Figure 2.** A) Regions demonstrating higher prestimulus BOLD activity for remembered  
181 vs. forgotten clips ( $p < 0.001$ , cluster pFWE  $< .05$ ) in Experiment 1. Data are shown on

182 sagittal and axial slices of an MNI template. aI - anterior insula; aPFC - anterior prefrontal;  
183 dACC - dorsal anterior cingulate cortex. **B)** For illustration purposes, mean group BOLD  
184 signal (after z scoring each time course) for remembered and forgotten clips in Experiment  
185 1 were extracted from two regions of the cingulo-opercular network using a functional  
186 ROI. The black lines indicate the onset of clip presentation, the gray lines indicate the offset  
187 of the current clips, and the dashed lines represent the mean onset of the instruction cue.  
188 The bar figures represent the mean activity during the instruction time-window for each of  
189 the conditions.  
190

| Side | Region                       | MNI Coordinates |     |    | t-value | Voxels |
|------|------------------------------|-----------------|-----|----|---------|--------|
|      |                              | (x, y, z)       |     |    |         |        |
| L    | Anterior Prefrontal          | -27             | 38  | 7  | 6.36    | 375    |
| R    | Anterior Prefrontal + Insula | 33              | 47  | 22 | 6.12    | 234    |
| R    | Superior Frontal             | 15              | 62  | 1  | 4.99    | 232    |
| L    | Anterior Insula              | -33             | 14  | 4  | 4.65    | 53     |
| R    | Postcentral                  | 36              | -40 | 58 | 4.59    | 85     |
| L    | Precuneus                    | 12              | -70 | 43 | 4.41    | 126    |
| R    | Dorsal anterior Cingulate    | 3               | 20  | 37 | 4.36    | 175    |
| L    | Inferior Parietal            | -36             | -52 | 40 | 4.28    | 62     |

191 **Table 1.** Brain activity for the whole-brain analysis of the remembered > forgotten contrast  
192 ( $p < .001$ , cluster pFWE < .05). Note that the right anterior prefrontal cluster extended to  
193 the right anterior insula.

## 194 195 **Experiment 2**

196 Data from a second experiment were used to replicate the findings of Experiment 1  
197 and to explore the role of the cingulo-opercular network in modulating memory  
198 performance. The cingulo-opercular network is usually associated with adaptive control of  
199 attention (Dosenbach et al., 2008) and therefore we predicted that this network may set the

200 stage for encoding by modulating online clip-related activity. In order to test this prediction  
201 we probed for possible mediators linking prestimulus cingulo-opercular activity and  
202 memory performance using a parametric analysis. Then, we conducted two multi-level  
203 logistic Bayesian mediation models to examine the role of these potential mediators in the  
204 association between cingulo-opercular activity and memory performance.

## 205 **Materials and methods**

206 A data-set from an independent study previously conducted in our lab (Experiment  
207 3 in Ben-Yakov and Dudai, 2011) was used in the current experiment.

### 208 *Participants*

209 Experiment 2 included 21 participants. Three participants were excluded due to low  
210 memory performance (correctly recalled less than 10% of the movies), hence the resultant  
211 sample included 18 participants (11 males, mean age =  $26.7 \pm 2.8$ ). The study was approved  
212 by the ethics committee of the Weizmann Institute of Science and all subjects gave  
213 informed consent prior to the experiment.

### 214 *Stimuli*

215 Each participant viewed 128 clips. Of these clips, 112 were narrative movie clips and  
216 were used in the current analysis. The clips were of varied lengths (32 clips of 8 s, 64 clips  
217 of 12 s, and 16 clips of 16 s). The task included also control clips and 4 brief blocks of a  
218 go/no-go task (Ben-Yakov et al., 2011).

### 219 *Experimental protocol*

220 **Study session.** The Study session took place in an fMRI scanner and was divided  
221 into two scanning runs. The clips were presented in random order; each clip was preceded  
222 by a fixation screen of jittered length (8/10/12/14/16 s with average of 10.75 s).

223           **Test session.** The Test session was similar to the one used in Experiments 1, but was  
224 administered one day following the Study session.

### 225 *fMRI acquisition and data analysis*

226           The experiment was carried out on a 3T Trio Magnetom Siemens scanner at the  
227 Weizmann Institute of Science, Rehovot, Israel. BOLD contrast was obtained using a  
228 gradient-echo EPI sequence (FOV – 24 cm, matrix size – 80 x 80, voxel size – 3 x 3 x 4  
229 mm<sup>3</sup>, TR/TE/FA = 2,000 ms / 30 ms / 75 degrees, 36 axial slices). A T1-weighted 3D  
230 MPRAGE sequence was used to collect anatomical scans (voxel size – 1 x 1 x 1 mm<sup>3</sup>,  
231 TR/TE/FA = 2,300 ms / 2.98 ms / 9 degrees).

### 232 *Data pre-processing*

233           See Experiment 1. In the current experiment, we omitted the first 15 volumes  
234 (during this time there was an audiovisual clip for accommodation to fMRI).

### 235 *Network definition*

236           In order to replicate the findings of Experiment 1, we created an ROI of the cingulo-  
237 opercular network based on a study by Dosenbach et al (2007), using WFUpickatlas  
238 toolbox (Maldjian et al., 2003; <http://fmri.wfubmc.edu/software/PickAtlas>). As in  
239 Dosenbach et al's paper, this ROI included 12mm spheres around peak coordinates (see  
240 Table 2) of the right and left anterior insula (aI), right and left anterior prefrontal (aPFC),  
241 and dorsal anterior cingulate cortex (dACC).

242

| Side | Region              | MNI Coordinates<br>(x, y, z) |    |    |
|------|---------------------|------------------------------|----|----|
| L    | Anterior Prefrontal | -28                          | 51 | 15 |
| R    | Anterior Prefrontal | 27                           | 50 | 23 |
| L    | Anterior Insula     | -35                          | 14 | 5  |

|   |                           |    |    |    |
|---|---------------------------|----|----|----|
| R | Anterior Insula           | 36 | 16 | 4  |
|   | Dorsal Anterior Cingulate | -1 | 10 | 46 |

243 **Table 2.** Coordinates of the cingulo-opercular network based on Dosenbach et al (2007).

244

#### 245 *Data analysis*

246 As in Experiment 1, prestimulus activity was modeled using box-car epochs  
247 convolved with the canonical hemodynamic response function (HRF) on the prestimulus  
248 time-window (8-16 sec preceding clip onset). For each participant, a set of five regressors  
249 were constructed, coding for the different prestimulus events  
250 (remembered/forgotten/control/x/go-nogo). In addition, six motion realignment nuisance  
251 regressors, as well as WM and CSF regressors, were added to the GLM, and a high-pass  
252 filter of 100 s was applied. As in Experiment 1, we computed the statistics for two  
253 additional control models (see Supplementary Information). The single-subject contrasts  
254 were then taken to a repeated-measures ANOVA with all task conditions as factors. A  
255 specific contrast assessed the main effect of interest (remembered > forgotten). A small  
256 volume correction (SVC) analysis using a threshold of  $p_{FWE} < .05$  (Friston et al., 1996)  
257 was performed on the cingulo-opercular ROI.

#### 258 *Identifying mediators*

259 A parametric analysis was conducted to explore the role of prestimulus activity in  
260 shaping online stimulus activity. This analysis searched for regions in which activity during  
261 clip presentation correlated with prestimulus cingulo-opercular activity. A new first-level  
262 model was created, in which we collapsed across remembered and forgotten trials (to  
263 increase power and to avoid a dependency between the parametric modulator and the main  
264 effect of memory performance). Therefore, the model included three regressors (narrative

265 clips [both remembered and forgotten], control clips, and go/no-go events), and their  
266 parametric modulation regressors. Since the cingulo-opercular regions were highly  
267 correlated, the parametric modulation regressors included ROI-averaged activity from all  
268 significant voxels within the cingulo-opercular mask (taken as a single ROI), as indicated  
269 by the SVC analysis described above for the remembered > forgotten contrast. A second-  
270 level analysis (one sample t-test, voxel-level threshold of  $p < 0.001$  and a cluster-level  
271 threshold of  $pFWE < 0.05$ ) was conducted only on the parametric regressor of the narrative  
272 clip events. We computed both the positive (1 coded) and negative (-1 coded) contrasts for  
273 the parametric regressor.

#### 274 ***Multi-level logistic mediation***

275 Multi-level logistic mediation analyses were conducted to examine whether the link  
276 between the observed prestimulus cingulo-opercular activity and subsequent memory is  
277 mediated by clip-related activity in candidate regions found in the parametric analysis. For  
278 this purpose, two additional regression models were estimated, in each of which we  
279 constructed separate regressors for each trial (e.g., Rissman et al., 2004). In the first of  
280 these single-trial models, we modeled the prestimulus phase of each event (total of 128  
281 regressors), convolved with the canonical HRF. The second model was constructed  
282 analogously, but the actual clip stimulus period was modeled (into an equal number of 128  
283 regressors). For each of the prestimulus and clip stimulus periods, we then extracted the  
284 ROI-averaged beta (amplitude) estimates for the cingulo-opercular network ROI for the  
285 prestimulus period, and for two sets of regions that were identified using the parametric  
286 model described above. The extracted and averaged betas were then, together with the  
287 memory performance (coded as 0 for forgotten and 1 for remembers), subjected to two

288 Bayesian multi-level logistical mediation analyses, which were conducted using the bmlm  
289 R package (Vuorre, 2017; Vuorre and Bolger, 2017). Bmlm uses the RStan interface to  
290 conduct the Bayesian inference (Stan Development Team, 2016). For each path (a, b, c, c',  
291 ab) we present the fixed-effect parameter, and its associated credible intervals (95% mass  
292 of the marginal posterior distribution).

293

## 294 **Results**

### 295 *Memory performance*

296 Participants remembered  $27.6 \pm 3.9\%$  of the clips.

### 297 *Prestimulus activity in the cingulo-opercular network predicts subsequent memory.*

298 In order to assess the robustness of the findings in Experiment 1, an ROI of the  
299 cingulo-opercular network was used in a small volume correction (SVC) analysis. This  
300 analysis revealed significant activations in all regions of the network (see Table 3 and  
301 Figure 3; results of a whole-brain analysis are presented in the Supplementary  
302 Information).

| Side | Region                    | MNI Coordinates |    |    | t-value | Voxels |
|------|---------------------------|-----------------|----|----|---------|--------|
|      |                           | (x, y, z)       |    |    |         |        |
| L    | Anterior Prefrontal       | -33             | 41 | 13 | 6.56    | 58     |
|      | Dorsal Anterior Cingulate | 0               | 11 | 43 | 6.33    | 86     |
| R    | Anterior Prefrontal       | 36              | 50 | 22 | 5.82    | 44     |
| L    | Anterior Insula           | -36             | 11 | -2 | 4.78    | 25     |
| R    | Anterior Insula           | 39              | 14 | -2 | 4.32    | 14     |



303

304 **Table 3.** Brain activity for the SVC analysis testing for cingulo-opercular activity in the  
305 remembered > forgotten contrast during the prestimulus time-window ( $p < .001$ , cluster  
306 pFWE < .05).

307

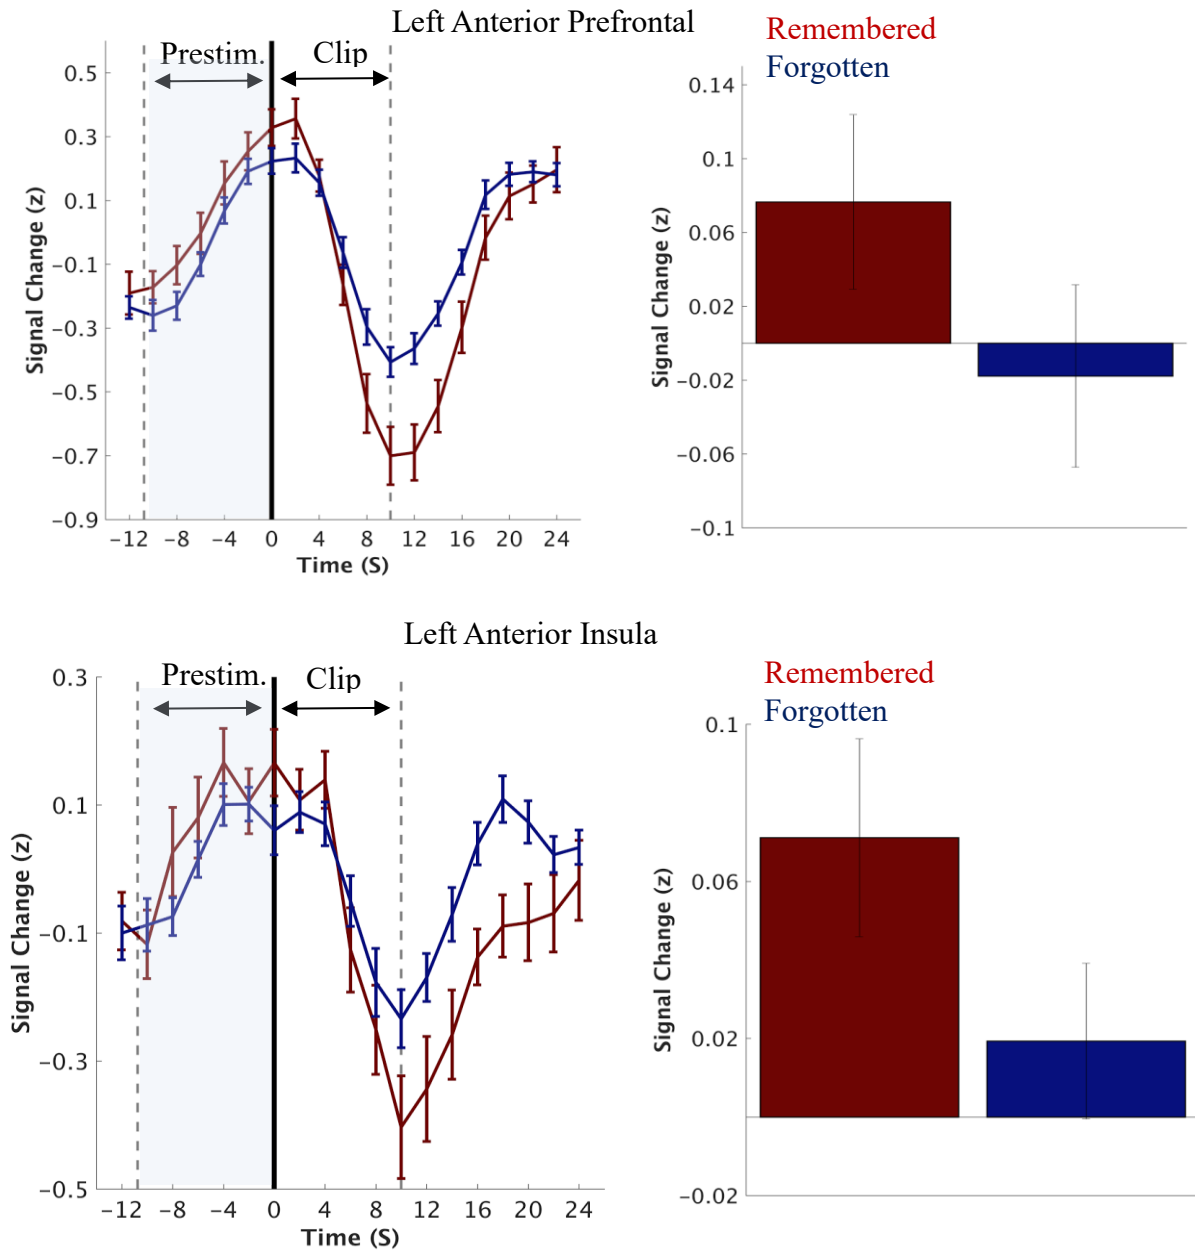

308

309 **Figure 3.** For illustration purposes, we present the mean group BOLD signal (after z  
310 scoring each time course) for remembered and forgotten clips in Experiment 2. BOLD  
311 activity was extracted from two example regions of the cingulo-opercular network using a  
312 functional ROI. The black lines indicate the onset of clip presentation, the gray lines  
313 indicate the offset of the current clips, and the dashed lines represent the mean onset of the  
314 instruction cue. The bar figures represent the mean activity during the instruction time-  
315 window for each of the conditions.

316

317 ***Parametric analysis probing possible mediators for the cingulo-opercular – memory***  
318 ***link.***

319 A parametric analysis was conducted in order to explore whether prestimulus  
320 activity in the cingulo-opercular network modulated activity during clip presentation. A  
321 whole-brain analysis was used to detect brain regions that, during the clip time-window,  
322 were positively or negatively associated with cingulo-opercular prestimulus activity.  
323 Regions that were positively associated with prestimulus activity were regions showing an  
324 increase in their activity during clip presentation following a higher prestimulus cingulo-  
325 opercular activity. Regions that were negatively associated with prestimulus activity were  
326 regions showing a *reduction* in their activity during clip presentation following a higher  
327 cingulo-opercular activity in the prestimulus phase.

328 The whole-brain analysis (see Table 3) for positive modulation by cingulo-  
329 opercular activity revealed significant activations in the fusiform gyrus and middle  
330 temporal regions. The whole-brain analysis for the negative parametric modulation showed

331 significant activations in a set of regions that included the cingulate, precuneus, and  
 332 striatum.

333

| Side                              | Region                           | MNI<br>Coordinates |     |     | t-value | Voxels |
|-----------------------------------|----------------------------------|--------------------|-----|-----|---------|--------|
|                                   |                                  | (x, y, z)          |     |     |         |        |
| Positive Parametric Contrast (+1) |                                  |                    |     |     |         |        |
| R                                 | Fusiform & Middle Temporal Gyrus | 30                 | -67 | -8  | 9.06    | 1572   |
| L                                 | Fusiform & Middle Temporal Gyrus | -30                | -61 | -5  | 7.92    | 901    |
| R                                 | Precuneus                        | 15                 | -46 | 46  | 6.48    | 138    |
| R                                 | Inferior Frontal                 | 57                 | 32  | 1   | 5.88    | 189    |
| L                                 | Cerebellum                       | -12                | -70 | -38 | 5.87    | 97     |
|                                   | Rectus                           | 0                  | 56  | -17 | 5.24    | 53     |
| Negative Parametric Contrast (-1) |                                  |                    |     |     |         |        |
| L                                 | Middle Cingulate                 | -3                 | -23 | 31  | 13.73   | 1009   |
| R                                 | Middle Frontal                   | 30                 | 50  | 19  | 10.85   | 360    |
| L                                 | Middle Frontal                   | -36                | 47  | 16  | 10.05   | 769    |
| L                                 | Precuneus                        | -9                 | -67 | 46  | 8.33    | 370    |
| L                                 | Middle Cingulate                 | -3                 | -22 | 31  | 7.90    | 176    |
| L                                 | Insula                           | -36                | 17  | 4   | 7.36    | 475    |
| R                                 | Striatum (Caudate, Putamen)      | 18                 | 20  | -5  | 6.81    | 145    |
| R                                 | Insula                           | 33                 | 23  | 7   | 6.73    | 222    |
| L                                 | Inferior Parietal                | -39                | -49 | 43  | 6.72    | 283    |
| L                                 | Striatum (Caudate, Putamen)      | -15                | 17  | -5  | 6.23    | 47     |
| R                                 | Inferior Parietal                | 54                 | -43 | 40  | 5.67    | 107    |
| R                                 | Middle Cingulate                 | 6                  | -28 | 46  | 5.57    | 44     |

334 **Table 4.** Brain activity for the whole-brain parametric analysis of the positive (+1) and  
 335 negative (-1) contrasts. Prestimulus cingulo-opercular activity served as a parameter to  
 336 predict correlated clip-related activity ( $p < .001$ , cluster pFWE  $< .05$ ).

337

338 ***Mediation analysis for the cingulo-opercular – memory link.***

339 Two mediation analyses were conducted to measure whether the link between  
340 prestimulus cingulo-opercular activity and memory was mediated by activity in the set of  
341 brain regions found in the parametric analysis. Specifically, we tested whether activity in  
342 regions found in the positive parametric contrast and activity in regions found in the  
343 negative parametric contrast mediate the cingulo-opercular - memory link. Both analyses  
344 indicated partial mediation, suggesting that around 45% of the link between prestimulus  
345 cingulo-opercular activity and successful memory performance was mediated by an  
346 increase in clip-related activity in a set of temporal regions (Figure 4a) and by decrease in  
347 clip-related activity in a set of regions that included the precuneus, striatum, and cingulate  
348 cortex (Figure 4b). Specifically, measuring the path coefficients for a standard three-  
349 variable path model that used activity from regions revealed in the positive parametric  
350 contrast (+1) as mediator demonstrated credible relationships between prestimulus  
351 cingulo-opercular activity and memory performance (path c:  $b = 0.98$ , [0.67, 1.3]),  
352 prestimulus cingulo-opercular activity and activity in regions found in the positive  
353 parametric contrast (path a:  $b = 0.16$  [0.14, 0.19]), and between activity in regions found  
354 in the positive parametric contrast and memory performance (path b:  $b = 2.67$  [1.94, 3.43]).  
355 Furthermore, the relationship between cingulo-opercular prestimulus activity and memory  
356 was reduced when activity in regions found in the positive parametric contrast was included  
357 in the model (path ab:  $b = 0.44$  [0.31, 0.58]), although the relationship between the  
358 prestimulus cingulo-opercular activity and memory was still present (path c':  $b = 0.54$   
359 [0.26, 0.84]).

360 Measuring the path coefficients for the model that used activity from regions  
361 revealed in the negative parametric contrast (-1) as mediator revealed credible relationships

362 between prestimulus cingulo-opercular activity and memory performance (path c:  $b = 0.93$ ,  
363  $[0.63, 1.25]$ ), prestimulus cingulo-opercular activity and activity revealed in the negative  
364 parametric contrast (path a:  $b = -0.26$   $[-0.28 -0.23]$ ), and between activity revealed in the  
365 negative parametric contrast and memory performance (path b:  $b = -1.58$   $[-2.26, -0.93]$ ).  
366 As in the aforementioned model, the relationship between prestimulus cingulo-opercular  
367 activity and memory was reduced when the mediator (activity in regions found in the  
368 negative parametric contrast) was included in the model (path ab:  $b = 0.4$   $[0.23, 0.59]$ ),  
369 although the relationship between the prestimulus cingulo-opercular activity and memory  
370 was still present (path c':  $b = 0.53$   $[0.23, 0.84]$ ).

371 Thus, the statistical criteria for partial mediation were met in both models,  
372 indicating that for the average participant, the enhanced memory performance linked to  
373 increased prestimulus activity in the cingulo-opercular network was partially accounted for  
374 by the increased activity in a network including temporal regions and decreased activity in  
375 a network including the precuneus, cingulate and striatum.

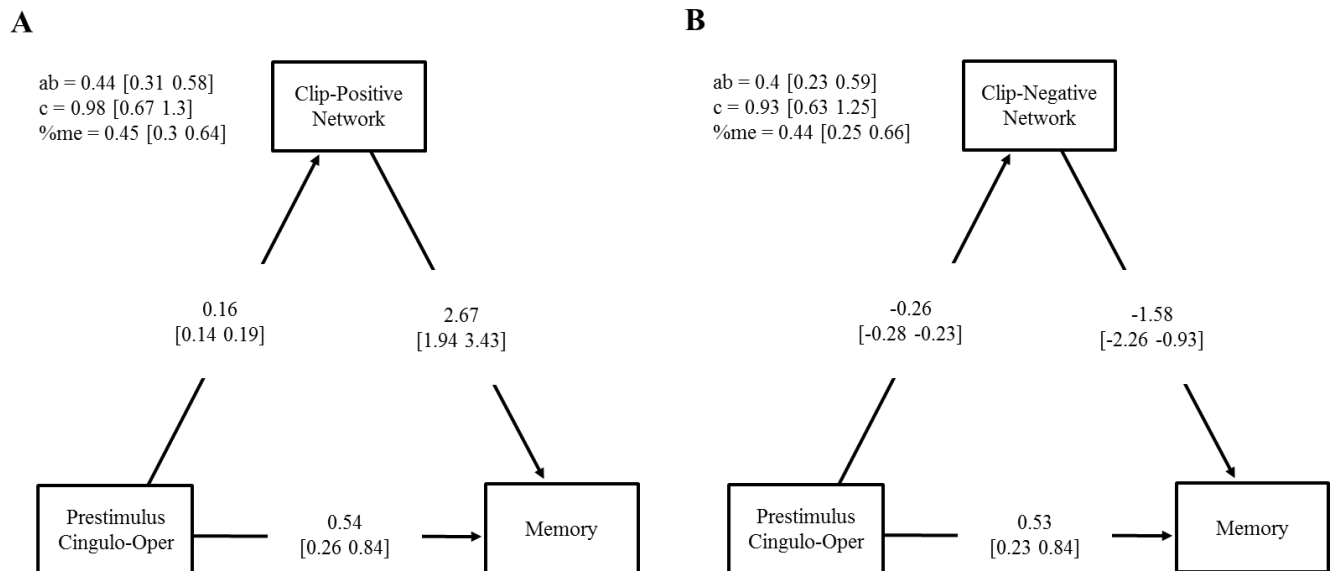

376

377 **Figure 4.** Multi-level mediation analyses assessing the contribution of regions implicated  
378 in the parametric analysis. A) A model including activity from the set of regions found in  
379 the positive contrast of the parametric analysis (Clip-Positive Network) as a mediator. B)  
380 A model including activity from the set of regions found in the negative contrast of the  
381 parametric analysis (Clip-Negative Network) as a mediator.

382

### 383 **General Discussion**

384 The current study is the first to explore naturally occurring prestimulus brain  
385 activity that predicts encoding of novel, real life events. Furthermore, the current study is  
386 the first to provide a mechanistic account linking the observed prestimulus activity to  
387 memory formation via modulation of online stimulus activity. In two independent data sets,  
388 we found that prestimulus activity in the cingulo-opercular network correlates with  
389 subsequent memory performance. Mediation analyses revealed that prestimulus cingulo-  
390 opercular activity gates memory performance by enhancing clip-related activity in  
391 temporal regions and by dampening clip-related activity in a set of regions that include the  
392 precuneus, cingulate and striatum.

393 According to the dual model network of attentional control (Dosenbach et al., 2008),  
394 the cingulo-opercular network is associated with adaptive control of attention and the  
395 maintenance of task goals. Thus, our findings may indicate that attentional states preceding  
396 an event play a crucial role in shaping long-term memory. This idea raises a question  
397 regarding the nature of the observed memory-predictive attentional state, and specifically  
398 whether memory-predictive activity in the cingulo-opercular network results from a

399 deliberate preparatory process or from an incidental attentional state. The fact that we did  
400 not observe a main effect for instruction type (remember > look) in the cingulo- opercular  
401 network in Experiment 1 (see SI), and that we replicated this effect in Experiment 2 (in  
402 which there was no instruction cue prior to the memoranda), suggests that memory-  
403 predictive activation in this network was less related to intentional preparation (see also  
404 Turk-Browne et al., 2006; Addante et al., 2015). Therefore, we postulate that incidental  
405 brain fluctuations in the cingulo-opercular network modulate encoding. Specifically,  
406 events starting during incidental high activity in this network may be remembered better  
407 than events starting during incidental low activity. In support of this notion are imaging  
408 (Yoo et al., 2012), electrophysiological (Burke et al., 2014) and intracranial brain  
409 stimulation (Ezzyat et al., 2017) findings showing that prestimulus brain oscillations can  
410 influence memory-related processes.

513         While the current work focused on cingulo-opercular activity in the prestimulus  
514 phase, an examination of the time course reveals that this network plays an opposite role  
515 during stimulus presentation. Specifically, during the clips, the cingulo-opercular network  
516 was deactivated more strongly for subsequently-remembered clips compared to  
517 subsequently forgotten ones. This is in line with previous findings (e.g., Daselaar et al.,  
518 2004), and may suggest that processes needed for the preparation of efficient encoding  
519 during the prestimulus phase are no longer needed (and should even be suppressed) during  
520 the event. This finding may also help reconcile the mixed findings regarding the memory-  
521 predictive effect of cingulo-opercular activity during stimulus presentation (e.g., Vaden et  
522 al., 2017).

523           Our findings suggest both direct and indirect influence of prestimulus cingulo-  
524 opercular activity on memory performance. Specifically, using a multi-level logistic  
525 mediation analyses we showed that the link between prestimulus cingulo-opercular activity  
526 and memory is partially mediated by clip-related activity in two distinct networks. Namely,  
527 elevated activity in the cingulo-opercular network was associated with enhanced activity  
528 in regions such as the fusiform and middle temporal gyrus, which are thought to play a role  
529 in encoding (for a meta-analyses see Sapniol et al., 2009; Murty et al., 2010; Kim et al.,  
530 2011), and with reduced activity in a set of regions usually observed during retrieval and  
531 self-referential processing (for meta-analysis and review papers see: Wagner et al., 2005;  
532 Northoff et al., 2006; Kim et al., 2010; Sapniol et al., 2009). These results support previous  
533 findings showing a competitive relationship between networks involved in encoding and  
534 retrieval (Kuhl et al., 2010; Kim et al., 2010) and suggest a gating role for attention in  
535 determining which of these processes will take precedence. Specifically, as attention plays  
536 a prominent role in shifting between external and internal focus (Chun et al., 2011; Kucyi  
537 et al., 2017), it is possible that prestimulus attentional state enhances encoding by  
538 promoting external focus as well as by suppressing interference by internally-generated  
539 thoughts (e.g., retrieval of past memories).

540           Most previous fMRI studies that explored the association between prestimulus  
541 activity and memory performance presented a cue that predicted the content of the to-be-  
542 remembered event (Adcock et al., 2006; Mackiewicz et al., 2006; Wittmann et al., 2007;  
543 Park and Rugg, 2010; Addante et al., 2015), making it possible that the anticipation for  
544 specific content modulated the observed effects. Indeed, several of the regions found in  
545 these studies seem to be content related since they were not found in other studies (e.g.,



546 amygdala predicted memory when participants anticipated an aversive stimulus;  
547 Mackiewicz et al., 2006; midbrain predicted memory when participants anticipated a  
548 rewarding stimulus; Adcock et al., 2006). In the few studies that did not present a cue prior  
549 to the memoranda, temporal anticipation was still present (Fernández et al., 1999; Turk-  
550 Browne et al., 2006; Yoo et al., 2012). In the current study, the results cannot be explained  
551 by anticipation because no relevant cue was given prior to the movie clips and the effects  
552 of degree of temporal anticipation were accounted for in the design (Experiment 1) and  
553 analysis (Experiments 1 & 2; see SI).

554 Additional control analyses (reported in the SI) ruled out sequential effects (i.e.,  
555 effects related to memory performance in the previous clip), as well as arousal influences  
556 (as indicated by a parametric analysis that included pupil dilation). Furthermore, we  
557 demonstrated that findings of the current work cannot be explained by temporal  
558 anticipation or by overlap between prestimulus and stimulus-related activity. Therefore,  
559 the findings of the current work lead to several predictions that may be tested in further  
560 studies. Specifically, real-time fMRI and TMS/tDCS/intracranial stimulation studies can  
561 provide direct evidence for the role of spontaneous cingulo-opercular fluctuations in  
562 memory success. Furthermore, studies manipulating attention and task-goals can provide  
563 evidence for the role on intentional attentional states in enhancing encoding and in reducing  
564 interference by internal focus.

565 In conclusion, we propose that prestimulus attentional states as reflected in cingulo-  
566 opercular activity may enhance memory encoding by shifting the balance between  
567 encoding and retrieval – increasing focus on the external environment while reducing  
568 interference from task-unrelated, internally generated, memories.

569 **Funding**

570 This work was supported by the EP7 Human Brain Project (N.C., R.P. and Y.D.)  
571 and by Israeli Center of Research Excellence (I-CORE) in the Cognitive Sciences of the  
572 Planning and Grants Committee and the Israeli Science Foundation Grant 51/11 (R.P. and  
573 Y.D.).

574

575 **Acknowledgments**

576 The authors declare that they had no conflicts of interest with respect to their  
577 authorship or the publication of this article. We wish to thank Sam Hutton for his help with  
578 the programming of Experiment 1, Yael Holtzman for her help in running participants,  
579 Matti Vuorre for his help with the multi-level mediation analysis, and Edna Haran and the  
580 Weizmann MRI technician team, for assistance in the imaging scans. We also wish to thank  
581 Daphna Shohamy and Mariam Aly for helpful ideas and suggestions during analysis and  
582 manuscript preparation.

583 **References**

- 584 Adcock RA, Thangavel A, Whitfield-Gabrieli S, Knutson B, Gabrieli JDE. 2006.  
585 Reward-motivated learning: Mesolimbic activation precedes memory formation. *Neuron*  
586 50:507–517.
- 587 Addante RJ, de Chastelaine M, Rugg MD. 2015. Pre-stimulus neural activity  
588 predicts successful encoding of inter-item associations. *NeuroImage* 105:21–31.
- 589 Ashburner J, Friston KJ. 2005. Unified segmentation. *Neuroimage* 26:839-851.
- 590 Ben-Yakov A, Dudai Y. 2011. Constructing realistic engrams: Poststimulus  
591 activity of hippocampus and dorsal striatum predicts subsequent episodic memory. *J*  
592 *Neurosci.* 31:9032–9042.
- 593 Ben-Yakov A, Eshel N, Dudai Y. 2013. Hippocampal immediate poststimulus  
594 activity in the encoding of consecutive naturalistic episodes. *J Exp Psychol: General*  
595 142:1255-1263.
- 596 Ben-Yakov A, Rubinson M, Dudai Y. 2014. Shifting gears in hippocampus:  
597 temporal dissociation between familiarity and novelty signatures in a single event. *J*  
598 *Neurosci* 34:12973-12981.
- 599 Burke JF, Merkow M, Jacobs J, Kahana MJ, Zaghoul K. 2014. Brain computer  
600 interface to enhance episodic memory in human participants. *Front Hum Neurosci.* 8:1055.
- 601 Cohen N, Pell L, Edelson MG, Ben-Yakov A, Pine A, Dudai Y. 2015. Peri-  
602 encoding predictors of memory encoding and consolidation. *Neurosci Biobehav Rev.*  
603 50:128-142.

604 Davachi L, Mitchell JP, Wagner AD. 2003. Multiple routes to memory: distinct  
605 medial temporal lobe processes build item and source memories. *Proc Natl Acad Sci.*  
606 100:2157–2162.

607 Daselaar SM, Prince SE, Cabeza R. 2004. When less means more: deactivations  
608 during encoding that predict subsequent memory. *Neuroimage* 23:921-927.

609 de Chastelaine M. Rugg MD. 2015. The effects of study task on prestimulus  
610 subsequent memory effects in the hippocampus. *Hippocampus* 25:1217-1223.

611 Chun MM, Golomb JD, Turk-Browne NB. 2011. A taxonomy of external and  
612 internal attention. *Ann Rev Psychol.* 62:73-101.

613 Dosenbach NU, Fair DA, Cohen AL, Schlaggar BL, Petersen SE. 2008. A dual-  
614 networks architecture of top-down control. *Trends Cogn Sci.* 12:99-105.

615 Dosenbach NU, Fair DA, Miezin FM, Cohen AL, Wenger KK, Dosenbach RA, ...  
616 Schlaggar BL. 2007. Distinct brain networks for adaptive and stable task control in  
617 humans. *Proc Natl Acad Sci.* 104:11073-11078.

618 Eichenbaum H, Yonelinas AP, Ranganath C. 2007. The medial temporal lobe and  
619 recognition memory. *Annu Rev Neurosci* 30:123–152.

620 Eklund A, Nichols TE, Knutssona H. 2016. Cluster failure: Why fMRI inferences  
621 for spatial extent have inflated false-positive rates. *Proc Natl Acad Sci* 113:7900-7905.

622 Ezzyat Y, Kragel JE, Burke JF, Levy DF, Lyalenko A, Wanda P, O’Sullivan L,  
623 Hurley KB, Busygin S, Pedisich I, Sperling MR. 2017. Direct brain stimulation modulates  
624 encoding states and memory performance in humans. *Current Biology* 27:1251-1258.

625 Fernández G, Brewer JB, Zhao Z, Glover GH, Gabrieli JD. 1999. Level of sustained  
626 entorhinal activity at study correlates with subsequent cued-recall performance: A

627 functional magnetic resonance imaging study with high acquisition rate. *Hippocampus*  
628 9:35-44.

629 Frey U, Huang YY, Kandel ER. 1993. Effects of cAMP simulate a late stage of  
630 LTP in hippocampal CA1 neurons. *Science* 1661-1664.

631 Friston KJ, Holmes A, Poline JB, Price CJ, Frith CD. 1996. Detecting activations  
632 in PET and fMRI: levels of inference and power. *NeuroImage* 4:223–235.

633 Huang YY, Kandel ER. 1995. D1/D5 receptor agonists induce a protein synthesis-  
634 dependent late potentiation in the CA1 region of the hippocampus. *Proc Nat Acad Sci*  
635 92:2446-2450.

636 Kim H, Daselaar SM, Cabeza R. 2010. Overlapping brain activity between episodic  
637 memory encoding and retrieval: roles of the task-positive and task-negative networks.  
638 *Neuroimage* 49:1045-1054.

639 Kim H. 2011. Neural activity that predicts subsequent memory and forgetting: A  
640 meta-analysis of 74 fMRI studies. *NeuroImage* 54:2446–2461.

641 Kucyi A, Hove MJ, Esterman M, Hutchison RM, Valera EM. 2016. Dynamic brain  
642 network correlates of spontaneous fluctuations in attention. *Cereb Cortex* 27:1831-1840.

643 Kuhl BA, Rissman J, Chun MM, Wagner AD. 2011. Fidelity of neural reactivation  
644 reveals competition between memories. *Proc Nat Acad Sci.* 108:5903-5908.

645 Mackiewicz KL, Sarinopoulos I, Cleven KL, Nitschke JB. 2006. The effect of  
646 anticipation and the specificity of sex differences for amygdala and hippocampus function  
647 in emotional memory. *Proc Natl Acad Sci.* 103:14200–14205.

648 Maldjian JA, Laurienti PJ, Kraft RA, Burdette JH. 2003. An automated method for  
649 neuroanatomic and cytoarchitectonic atlas-based interrogation of fMRI data sets.  
650 *NeuroImage* 19:1233–1239.

651 Mazziotta JC, Toga AW, Evans A, Fox P, Lancaster J. 1995. A probabilistic atlas  
652 of the human brain: Theory and rationale for its development: The International  
653 Consortium for Brain Mapping (ICBM). *NeuroImage* 2:89–101.

654 Murty VP, Ritchey M, Adcock RA, LaBar KS. 2010. fMRI studies of successful  
655 emotional memory encoding: A quantitative meta-analysis. *Neuropsychologia* 48:3459-  
656 3469.

657 Niemi P, Näätänen R. 1981. Foreperiod and simple reaction time. *Psychol Bull.*  
658 89:133–162.

659 Northoff G, Heinzl A, De Greck M, Bermpohl F, Dobrowolny H, Panksepp J,  
660 2006. Self-referential processing in our brain—a meta-analysis of imaging studies on the  
661 self. *Neuroimage* 31:440-457.

662 Otmakhova NA, Lisman JE. 1996. D1/D5 dopamine receptor activation increases  
663 the magnitude of early long-term potentiation at CA1 hippocampal synapses. *J*  
664 *Neurosci* 16:7478-7486.

665 Paller KA, Kutas M, Mayes AR. 1987. Neural correlates of encoding in an  
666 incidental learning paradigm. *Electroencephalography and Clinical Neurophysiology,*  
667 67:360–371.

668 Paller KA, Wagner AD. 2002. Observing the transformation of experience into  
669 memory. *Trends Cogn Sci.* 6:93–102.

670 Park H, Rugg, MD. 2010. Prestimulus hippocampal activity predicts later  
671 recollection. *Hippocampus* 20:24–28.

672 Spaniol J, Davidson PS, Kim AS, Han H, Moscovitch M, Grady CL. 2009. Event-  
673 related fMRI studies of episodic encoding and retrieval: meta-analyses using activation  
674 likelihood estimation. *Neuropsychologia* 47:1765-1779.

675 Staresina BP, Alink A, Kriegeskorte N, Henson RN. 2013. Awake reactivation  
676 predicts memory in humans. *Proc Nat Acad Sci* 110:21159-21164.

677 Tambini A, Ketz N, Davachi L. 2010. Enhanced brain correlations during rest are  
678 related to memory for recent experiences. *Neuron* 65:280-290.

679 Tompary A, Duncan K, Davachi L. 2015. Consolidation of associative and item  
680 memory is related to post-encoding functional connectivity between the ventral tegmental  
681 area and different medial temporal lobe subregions during an unrelated task. *J Neurosci*  
682 35:7326-7331.

683 Turk-Browne NB, Yi DJ, Chun MM. 2006. Linking implicit and explicit memory:  
684 Common encoding factors and shared representations. *Neuron* 49:917–927.

685 Vaden KI, Teubner-Rhodes S, Ahlstrom JB, Dubno JR, Eckert MA. 2017. Cingulo-  
686 opercular activity affects incidental memory encoding for speech in noise. *NeuroImage*.

687 Vuorre M, Bolger N. 2017. Within-subject mediation analysis for experimental  
688 data in cognitive psychology and neuroscience. OSF Preprint.  
689 <http://dx.doi.org/10.17605/OSF.IO/6JHPF>

690 Wagner AD, Shannon BJ, Kahn I, Buckner RL. 2005. Parietal lobe contributions  
691 to episodic memory retrieval. *Trends Cogn Sci* 9:445-453.

692 Wittmann BC, Bunzeck N, Dolan RJ, Düzel E. 2007. Anticipation of novelty  
693 recruits reward system and hippocampus while promoting recollection. *NeuroImage*  
694 38:194–202.

695 Yoo JJ, Hinds O, Ofen N, Thompson TW, Whitfield-Gabrieli S, Triantafyllou C,  
696 Gabrieli J D. 2012. When the brain is prepared to learn: enhancing human learning using  
697 real-time fMRI. *NeuroImage* 59: 846-852.

698

699
